# Supplementary material
Source: HighWire-hosted journal article supplement (https://ez-admanager.com/highwire/filestream/136838/field_highwire_adjunct_files/0/li_1444.pdf)
Supplement: li_1444.pdf [file li_1444.pdf]

# 特殊年龄段偏头痛患者与隐源性 TIA 及卒中的相关性

## 以人群为基础的研究

Linxin Li, MD, DPhil  
 Ursula G. Schulz, MRCP,  
 DPhil  
 Wilhelm Kuker, FRCR  
 Peter M. Rothwell, MD,  
 PhD, FMedSci  
 On behalf of the Oxford  
 Vascular Study

Correspondence to  
 Dr. Rothwell:  
 peter.rothwell@ndcn.ox.ac.uk

### 摘要

**目的：**旨在确定中老年的偏头痛史和隐源性 TIA 或缺血性卒中是否存在相关性。

**方法：**我们通过一项以人群为基础的队列研究（牛津血管研究；2002~2012）评估了不同年龄段既往偏头痛史患者与 TIA 及缺血性卒中的 TOAST（Trial of Org 10172 in Acute Stroke Treatment, TOAST）分型的相关性。

**结果：**在 1,810 例符合入组条件的 TIA 或缺血性卒中患者中，668 例（36.9%）具有隐源性脑血管事件，其中 187 例（28%）具有偏头痛史。相比于病因明确的脑血管事件，偏头痛更常与隐源性事件相关 [比值比 (odds ratio, OR) 1.73, 95% 可信区间 (confidence interval, CI) : 1.38~2.16,  $p < 0.0001$ ; 心源性栓塞 2.00, 1.50~2.66,  $p < 0.0001$ ; 大动脉疾病 1.75, 1.20~2.53,  $p = 0.003$ ; 小血管疾病 1.32, 0.95~1.83,  $p = 0.096$ ]。偏头痛与隐源性事件的相关性独立于年龄、性别及全部所测的血管危险因素 (risk factor, RF) (校正 OR 1.68, 1.33~2.13,  $p < 0.0001$ )，且在老年患者 (< 55 岁, OR 1.11, 0.55~2.23; 55~64 岁, 1.48, 0.83~2.63;  $\geq 65$  岁, 1.81, 1.39~2.36) 和无血管危险因素的患者 (0 个危险因素 OR 2.62, 1.33~5.15; 1 个危险因素 2.01, 1.35~3.01; 2 个危险因素 1.80, 1.21~2.68; 3 个危险因素 1.21, 0.71~2.07; 4 个危险因素 0.92, 0.28~2.99) 中相关性最强。无论是按偏头痛有无先兆分析，还是排除 TIA 后的分析，或是按年龄或血管分布范围进行分层分析，其结果均相同。

**结论：**在这项按照年龄分层的基于人群的卒中病因学研究中，偏头痛与隐源性 TIA 及缺血性卒中相关性最强，尤其是在老年人中尤为明显，这提示其中存在因果关系或共有相同病因。

### 术语

CI = 可信区间; HRT = 激素替代疗法; MRA = 磁共振血管成像; OR = 比值比; OXVASC = 牛津血管研究; PFO = 卵圆孔未闭; RF = 危险因素; TOAST = 类肝素药物治疗急性缺血性卒中试验; WMC = 脑白质病变; HRT = 激素替代疗法。

与心肌梗死和周围血管疾病不同，尽管进行了详细的诊断性工作，但仍有高达 1/3 的 TIA 和缺血性卒中为隐源性的，仅在西欧每年就有大约 400,000 例隐源性卒中<sup>[1]</sup>。此外，虽然隐源性 TIA 或缺血性卒中的绝对复发率在不同研究中有所差异，但其预后与大动脉疾病及心源性栓塞相类似<sup>[2]</sup>。因此，更深入的理解隐源性 TIA 及缺血性卒中的发病机制显得尤为重要。

虽然有研究提出卵圆孔未闭 (patent foramen ovale, PFO) 相关的反常性栓塞及未诊断的阵发性房颤是一些隐源性 TIA 及卒中的病因<sup>[3-5]</sup>，但只有不到一半的病例可以明确归因于这些病因学说<sup>[6-9]</sup>，所以其他的危险因素 (risk factor, RF) 必然也重要。一些病例对照研究和队列研究显示偏头痛可将缺血性卒中的风险提高 2 倍<sup>[10,11]</sup>，但是只有 2 组结果相矛盾的青年卒中的病例对照研究真正关注于隐源性事件<sup>[12,13]</sup>。鉴于大多数隐源性 TIA 及卒中发生在老年患者，我们在排除了年龄因素的情况下，通过以所有 TIA 和卒中患者为基础的队列研究，评估偏头痛史与隐源性 TIA 或缺血性卒中的相关性。

**方法** 牛津血管研究 (the Oxford Vascular Study, OXVASC) 的首个 10 年 (2002 年 4 月 1 日~2012 年 3 月 31 日) 研究中纳入了首发 TIA 或缺血性卒中的连续病例。OXVASC 是关于脑血管、心血管及周围血管事件的发生率及预后的

From the Nuffield Department of Clinical Neurosciences, John Radcliffe Hospital, University of Oxford, UK.

Go to Neurology.org for full disclosures. Funding information and disclosures deemed relevant by the authors, if any, are provided at the end of the article.

补充数据见  
 Neurology.org

持续性群体性研究。不论年龄，研究人群包含了 92,728 例受试者，在英国牛津的 9 个全科诊所共注册了 100 名全科医生。OXVASC 的研究方法已经有所报道<sup>[14,15]</sup>。简言之，使用不同的多重重叠方法对所有 TIA 或卒中患者进行几乎完整的评估。这些包括（1）每天、快速地获得相应的全科医生和当地的急诊科所上交的可疑而非住院的 TIA 或卒中患者的临床信息；（2）每天搜索内科、卒中、神经内科及相关病房的入院患者；（3）每天搜索当地急诊科的登记册；（4）每天通过丧亡办公处搜集院内死亡记录；（5）每月搜集所有的死亡证明及院外死亡的验尸报告；（6）每月搜集全科医生的诊断编码及出院代码；（7）每月搜集所有的血管成像。卒中的定义是快速出现的局部或全脑功能丧失的症状或体征，其症状持续超过 24 小时或导致死亡，除血管因素外，无明显其他病因。短暂性脑缺血发作（TIA）定义为急性局部脑功能或视觉功能丧失，症状在 24 小时内恢复，且经过充分检查推测是由血管因素引起的<sup>[14]</sup>。

所有患者的详细临床病史都记录在案。患者定期接受脑影像学检查（CT 或 MRI）、血管成像 [颈动脉超声多普勒或 CT 血管成像 / 磁共振血管成像 (magnetic resonance angiography, MRA) 或数字减影血管造影]、12 导联心电图和血常规。当出现临床指征时（如潜在的隐源性 TIA/卒中；多灶性梗死；有心内膜炎高危因素，或存在已知的瓣膜病变或其他心源性疾病的）需行超声心电图、24 小时动态心电图和 5 天动态心电图监护。10 年的研究过程中，OXVASC 在不同时期采用不同的影像学检查手段。从 2002 年 4 月 1 日~2010 年 3 月 31 日（第一阶段），头颅 CT 和颈动脉多普勒超声是首选的影像学检查方法，当有临床指征时（如隐源性 TIA/卒中、年龄 < 55 岁、可疑后循环事件的患者）可选择 MRI 或 MRA。从 2010 年 4 月 1 日~2012 年 3 月 31 日（第二阶段），头颅 MRI 和颅内 MRA 成了首选的影像学检查方法。

所有的病例均由资深神经学家 (PMR) 进行回顾综述，其病因学分类根据改良 TOAST (Trial of Org 10172 in Acute Stroke Treatment, TOAST) 标准<sup>[16]</sup>。高血压和糖尿病没有专门进行分类<sup>[17]</sup>。患者的诊断性检查至少应包括脑影像学检查、心电图、血管造影，且没有明确的病因可寻时才能归类为隐源性 TIA 或卒中。无完整检查的患者只能归类为不明原因的 TIA 或卒中。患者未接受完整的检查常常是由于早期死亡或伴有其他严重疾病。也因为同样的原因，未接受完整检查的患者由于缺少面对面的问诊或仅有有限的问诊而不能发现其偏头痛史。为了避免由于低估不明原因卒中患者中偏头痛史的流行程度而造成结果的倚倚（因此而高估了偏头痛和隐源性卒中事件的相关

性），在分析时将 TOAST 分型中不明原因的卒中病例排除在外。颈动脉夹层或卵圆孔未闭的病例由于其与偏头痛明确的相关性也被排除在外。

各种危险因素通过面对面问诊和初次护理记录时的结构化问卷获得。偏头痛史包括事件前的任何一次已诊断的偏头痛。根据临床病史，偏头痛还细分为先兆偏头痛和无先兆偏头痛。我们所使用的结构化问卷包括（1）你是否曾确诊为偏头痛？（2）你是否发生过任何偏头痛先兆事件（如视觉/感觉/言语错乱或四肢无力）？（3）你是否有任何先兆症状持续超过 1 个小时？高血压、高胆固醇血症和糖尿病病史可由患者口述或医疗记录中的诊断记录或所使用的相关药物来确定。肿瘤包括确诊的实体瘤或血液系统恶性肿瘤。血栓史包括至少一次确诊的肺动脉栓塞或深静脉血栓。自身免疫性疾病的确证要求至少包含以下情况的一种：类风湿关节炎、I 型糖尿病、恶性贫血、银屑病、抗磷脂综合征、系统性红斑狼疮，干燥综合征、免疫相关性甲状腺疾病、克罗恩病和重症肌无力。我们同时也收集了一级亲属中卒中的家族史。另外，OXVASC 前瞻性地编码了颅脑成像中小血管疾病的标记，并已经发表<sup>[18]</sup>。年龄相关性的脑白质病变范围可以同时运用于 CT 和 MRI，分别对 2 个大脑半球的 5 个不同区域进行 0~3 分的评分。总评分分为：无 (0)，轻度 (1~5)，中度 (6~10)，重度 (> 10) 脑白质病变<sup>[19]</sup>。

**标准化程序批准、注册和患者知情同意。**所有患者需要获得亲属签署的知情同意书。OXVASC 通过了当地伦理委员会的批准 (OREC A:05/Q1604/70)。

**统计分析。**分类变量取其绝对值，并以百分比的形式记录，连续变量则以均值、标准差的形式记录。分别使用  $\chi^2$  检验和 *t* 检验来比较分类变量和连续变量。

我们分别单独和组合使用  $\chi^2$  检验和回归方程来比较了隐源性 TIA/卒中病例和病因明确为偏头痛（有或无先兆）的患病率。然后我们在校正了其他危险因素（年龄、性别、高血压、糖尿病、心绞痛、心肌梗死、周围血管疾病、吸烟史、高胆固醇血症、静脉血栓史、肿瘤和自身免疫性疾病）的情况下利用回归方程来确定偏头痛和隐源性病例间的独立相关性，并且按血管性危险因素（高血压、糖尿病、吸烟和高胆固醇血症）的数量进行分层分析。对于年龄、性别和血管分布范围（颈动脉 vs 椎基底动脉 vs 视觉事件）也进行了分层分析。灵敏度分析的实行要排除 TIA 病例和病前使用  $\beta$  受体阻滞剂的患者（来探究偏头痛药物对偏头痛和卒中间相关性的潜在影响）。所有的统计学分析均使用 SPSS 20 版本 (SPSS Inc., Chicago, IL.)。

**结果** 在第一期研究阶段出现缺血性事件（卒中 = 1,114, TIA = 696）的 1,810 例患者中，668 例（36.9%）患者属于隐源性事件，534 例（29.5%）患者有心源性栓塞，236 例（13.0%）患者有大动脉疾病，277 例（15.3%）患者有小血管疾病，65 例（3.6%）患者有多种病因，30 例（1.7%）患者有其他病因。仅一位患者具有偏头痛性梗死。基线特征列于表 1。

与病因明确的事件相比，隐源性事件的患者更常有偏头痛史：187/668（28.0%）vs 210/1142（18.4%）[比值比（odds ratio, OR）1.73, 95% 可信区间（confidence interval, CI）1.38~2.16,  $p < 0.0001$ ]。先兆偏头痛史（123/604 vs 134/1066; OR 1.78, 1.36~2.33,  $p < 0.0001$ ）和无先兆的偏头痛史（55/536 vs 52/984, OR 2.05, 1.38 - 3.04,  $p < 0.0003$ ）以及按性别和血管分布范围进行的分层分析（表 2 和表 e-1, 见 *Neurology*<sup>®</sup> 官网：

*Neurology.org*）结果都有相同的趋向。排除了 TIA 或术前服用  $\beta$  受体阻滞剂的病例后的灵敏度分析也获得一致的结果（表 e-2 和 e-3）。

与其他亚型相比，隐源性事件患者偏头痛发作也更频繁：与心源性栓塞比较（OR 2.00, 1.50~2.66,  $p < 0.0001$ ）、与大动脉疾病相比（1.75, 1.20~2.53,  $p = 0.003$ ）；与小血管疾病相比（1.32, 0.95~1.83,  $p = 0.096$ , 表 3），有或无先兆偏头痛结果均是如此（表 3）。其结果与年龄限制在 65 岁以上的患者进行的分析相一致（表 e-4）。

与预期结果一致，在所有的队列分析中偏头痛的发生率随年龄的增长而下降：< 55 岁，45/159（28.3%）；55~64 岁，64/240（26.7%）； $\geq 65$  岁，288/1411（20.4%）， $p_{\text{trend}} = 0.004$ 。然而，在隐源性 TIA 或卒中的患者中偏头痛的发生率不随年龄的增长而下降（ $p = 0.52$ , 表 2），按照年龄进行分层分析可见，偏头痛和隐源性事件的相关性在

**表 1 缺血性卒中 / TIA 的基线特征表**

|                            | 隐源性<br>(n = 668) | CE(n = 534) | LAD(n = 236) | SVD(n = 277) | MULT(n = 65) | 其他<br>(n = 30) | 合计<br>(n = 1810)         | p 值     |
|----------------------------|------------------|-------------|--------------|--------------|--------------|----------------|--------------------------|---------|
| <b>危险因素, n (%)</b>         |                  |             |              |              |              |                |                          |         |
| 年龄, 均值                     | 70.7 (12.7)      | 78.3 (11.5) | 73.5 (9.9)   | 70.1 (12.6)  | 78.4 (8.6)   | 63.5 (18.0)    | 73.4 (12.5)              | <0.0001 |
| 男性                         | 325 (48.7)       | 244 (45.7)  | 141 (59.7)   | 166 (59.9)   | 42 (64.6)    | 13 (43.3)      | 931 (51.4)               | <0.0001 |
| 高血压                        | 365 (54.6)       | 387 (72.5)  | 179 (75.8)   | 170 (61.4)   | 51 (78.5)    | 18 (60.0)      | 1,170 (64.6)             | <0.0001 |
| 糖尿病                        | 83 (12.4)        | 64 (12.0)   | 46 (19.5)    | 50 (18.1)    | 10 (15.4)    | 0 (0)          | 253 (14.0)               | 0.003   |
| 房颤                         | 3 (0.4)          | 488 (91.4)  | 12 (5.1)     | 4 (1.4)      | 55 (84.6)    | 2 (6.7)        | 564 (31.2)               | <0.0001 |
| 心绞痛                        | 73 (10.9)        | 129 (24.2)  | 47 (19.9)    | 34 (12.3)    | 23 (35.4)    | 3 (10.0)       | 309 (17.1)               | <0.0001 |
| 心肌梗死                       | 53 (7.9)         | 99 (18.5)   | 33 (14.0)    | 16 (5.8)     | 12 (18.5)    | 3 (10.0)       | 216 (11.9)               | <0.0001 |
| 周围血管疾病                     | 27 (4.0)         | 50 (9.4)    | 36 (15.3)    | 14 (5.1)     | 11 (16.9)    | 3 (10.0)       | 141 (7.8)                | <0.0001 |
| 高胆固醇血症                     | 227 (34.0)       | 196 (36.7)  | 117 (49.6)   | 97 (35.0)    | 26 (40.0)    | 10 (33.3)      | 673 (37.2)               | 0.002   |
| 体质指数, 均值                   | 26.3 (5.2)       | 26.3 (6.5)  | 26.5 (4.4)   | 26.9 (5.3)   | 25.7 (5.5)   | 25.5 (4.1)     | 26.4 (5.5)               | 0.55    |
| 现在吸烟                       | 112 (16.8)       | 35 (6.6)    | 43 (18.2)    | 66 (23.8)    | 10 (15.4)    | 4 (13.3)       | 270 (14.9)               | <0.0001 |
| 既往吸烟                       | 255 (38.3)       | 235 (44.2)  | 108 (45.8)   | 104 (37.5)   | 34 (52.3)    | 14 (46.7)      | 750 (41.5)               | 0.044   |
| 静脉血栓史                      | 43 (6.4)         | 37 (6.9)    | 18 (7.6)     | 6 (2.2)      | 2 (3.1)      | 5 (16.7)       | 111 (6.1)                | 0.007   |
| 癌症                         | 90 (13.5)        | 110 (20.6)  | 45 (19.1)    | 38 (13.7)    | 13 (20.0)    | 10 (33.3)      | 306 (16.9)               | 0.001   |
| 自身免疫性疾病                    | 95 (14.2)        | 100 (18.7)  | 33 (14.0)    | 29 (10.5)    | 13 (20.0)    | 5 (16.7)       | 275 (15.2)               | 0.036   |
| 偏头痛                        | 187 (28.0)       | 87 (16.3)   | 43 (18.2)    | 63 (22.7)    | 11 (16.9)    | 6 (20.0)       | 397 (21.9)               | <0.0001 |
| 先兆偏头痛 <sup>a</sup>         | 123 (18.7)       | 52 (9.9)    | 29 (12.5)    | 43 (16.0)    | 6 (9.4)      | 4 (13.8)       | 257 (14.5)               | 0.001   |
| <b>辅助检查</b>                |                  |             |              |              |              |                |                          |         |
| 头颅 CT/MRI 或尸检 <sup>b</sup> | 647 (96.9)       | 498 (93.3)  | 221 (93.6)   | 276 (99.6)   | 64 (98.5)    | 28 (93.3)      | 1734 (95.8) <sup>b</sup> | <0.001  |
| 颅外血管成像                     | 668 (100.0)      | 315 (59.0)  | 234 (99.2)   | 263 (94.9)   | 56 (86.2)    | 23 (76.7)      | 1559 (86.1)              | <0.0001 |
| 颅内血管成像                     | 308 (46.1)       | 85 (15.9)   | 114 (48.3)   | 92 (33.2)    | 21 (32.3)    | 15 (50.0)      | 635 (35.1)               | <0.0001 |
| 经胸壁超声心动图                   | 308 (46.1)       | 336 (62.9)  | 106 (44.9)   | 126 (45.5)   | 50 (76.9)    | 9 (30.0)       | 935 (51.7)               | <0.0001 |
| 长期心脏监测                     | 148 (33.0)       | 84 (15.9)   | 48 (29.1)    | 49 (23.9)    | 12 (18.8)    | 5 (19.2)       | 346 (24.1)               | <0.0001 |

缩略语：CE = 心源性栓塞；LAD = 大血管病变；MRI = 磁共振成像；MULT = 多种病因；s SVD = 小血管病变。

<sup>a</sup>33 个丢失数据。

<sup>b</sup> 伴有一过性黑朦，视网膜动脉阻断或致命性卒中的患者最易导致脑成像资料的不全。

**表 2** 按照年龄、性别及血管分布范围分层，隐源性事件患者与病因明确事件患者的偏头痛患病率比较

|               | 隐源性 (% 偏头痛)    | 病因明确 (% 偏头痛) <sup>a</sup> | OR (95% CI)                   | p 值                              |
|---------------|----------------|---------------------------|-------------------------------|----------------------------------|
| <b>年龄, 岁</b>  |                |                           |                               | <i>p</i> <sub>trend</sub> = 0.17 |
| < 55          | 26/89 (29.2)   | 19/70 (27.1)              | 1.11 (0.55-2.23)              | 0.77                             |
| 55-64         | 32/103 (31.1)  | 32/137 (23.4)             | 1.48 (0.83-2.63)              | 0.18                             |
| ≥ 65          | 129/476 (27.1) | 159/935 (17.0)            | 1.81 (1.39-2.36)              | <0.0001                          |
| <b>性别</b>     |                |                           |                               |                                  |
| 男性            | 70/325 (21.5)  | 90/606 (14.9)             | 1.57 (1.11-2.23) <sup>b</sup> | 0.01                             |
| 女性            | 117/343 (34.1) | 120/536 (22.4)            | 1.80 (1.33-2.43) <sup>b</sup> | <0.001                           |
| <b>血管分布范围</b> |                |                           |                               |                                  |
| 仅眼动脉          | 22/55 (40.0)   | 13/39 (33.3)              | 1.33 (0.57-3.14)              | 0.51                             |
| 颈动脉           | 122/419 (29.1) | 165/903 (18.3)            | 1.84 (1.40-2.41)              | <0.0001                          |
| VB            | 65/249 (26.1)  | 45/239 (18.8)             | 1.52 (0.99-2.34)              | 0.05                             |

缩略语: OR = 比值比; VB = 椎基底动脉分布区。

<sup>a</sup> 病因明确的病例包括大动脉疾病、心源性栓塞、小血管疾病、多因素及其他原因所致病变。

<sup>b</sup> 年龄校正 OR 一致 (男性 1.45, 1.02-2.06, *p* = 0.04; 女性 1.69, 1.24-2.29, *p* = 0.001)。

老年人中更强 (表 2): < 55 岁 (OR 1.11, 95% CI 0.55-2.23); 55-64 岁 (1.48, 0.83-2.63); ≥ 65 岁 (1.81, 1.39-2.36)。

一项多变量分析表明, 偏头痛与隐源性事件间的相关性与年龄、性别、高血压、糖尿病、心绞痛、心肌梗死、周围血管疾病、高胆固醇血症、吸烟、静脉血栓史、癌症及自身免疫性疾病无关 (表 4, 表 e-5)。此外, 当存在极少的血管性危险因素时, 偏头痛与隐源性事件间的相关性最强 (0 个危险因素 OR 2.62, 1.33-5.15; 1 个危险因素 2.01, 1.35-3.01; 2 个危险因素 1.80, 1.21-2.68; 3 个危险因素 1.21, 0.71-2.07; 4 个危险因素 0.92, 0.28-2.99, *p*<sub>trend</sub> = 0.032, 图), 特别是对于年龄 ≥ 65 岁的患者 (0 个危险因素 OR 2.70, 1.18-6.15; 1 个危险因素 2.25, 1.38-3.67; 2 个危险因素 2.04, 1.30-3.20; 3 个危险因素 1.17, 0.63-2.17; 4 个危险因素 0.58, 0.11-3.16, *p*<sub>trend</sub> = 0.028, 图)。类似的, 对于无卒

中家族史或脑影像学显示小血管病变较轻的患者, 偏头痛与隐源性事件间的相关性往往也更强 (无家族史 1.86, 1.39-2.50, *p* < 0.0001; 存在家族史 1.44, 0.97-2.13, *p* = 0.07; 无或轻度 WMB 1.95, 1.49-2.56, *p* < 0.0001; 中度或重度 WMC 1.09, 0.68-1.75, *p* = 0.71)。

对于正在接受激素替代疗法 (hormone replacement therapy, HRT) 的患者, 偏头痛与隐源性事件间的相关性通常更强 (发生 TIA 及缺血性卒中, 接受 HRT 3.63, 0.74-17.81, *p* = 0.10; 未接受 HRT 1.74, 1.28-2.37, *p* = 0.0004; 仅发生缺血性卒中, 接受 HRT 9.00 0.91-88.58, *p* = 0.046; 未接受 HRT 2.05, 1.33-3.14, *p* = 0.001)。

**讨论** 在本项以人群为基础的研究中, 我们发现隐源性 TIA 及缺血性卒中与偏头痛病史之间存在着最强的独立的相关性。另外, 对于年龄 ≥ 65 岁以

**表 3** 偏头痛分别与隐源性事件及其他病因所致卒中亚型之间关系的比较

| 病例(偏头痛/先兆偏头痛)           | 任意偏头痛            |         | 先兆偏头痛 <sup>a</sup> |         | 无先兆偏头痛 <sup>a</sup> |       |
|-------------------------|------------------|---------|--------------------|---------|---------------------|-------|
|                         | OR (95% CI)      | p 值     | OR (95% CI)        | p 值     | OR (95% CI)         | p 值   |
| <b>隐源性 (187/123) vs</b> |                  |         |                    |         |                     |       |
| 心源性栓塞 (87/52)           | 2.00 (1.50-2.66) | <0.0001 | 2.20 (1.55-3.12)   | <0.0001 | 2.04 (1.25-3.34)    | 0.004 |
| LAD (43/29)             | 1.75 (1.20-2.53) | 0.003   | 1.70 (1.10-2.64)   | 0.016   | 2.21 (1.10-4.42)    | 0.022 |
| SVD (63/43)             | 1.32 (0.95-1.83) | 0.096   | 1.27 (0.87-1.87)   | 0.216   | 2.04 (1.07-3.89)    | 0.027 |
| MULT (11/6)             | 1.91 (0.98-3.73) | 0.055   | 2.30 (0.97-5.47)   | 0.059   | 1.54 (0.54-4.43)    | 0.416 |
| 其他 (6/4)                | 1.56 (0.63-3.87) | 0.338   | 1.53 (0.52-4.50)   | 0.436   | 2.74 (0.36-20.68)   | 0.307 |

缩略语: CE = 心源性栓塞; CI = 可信区间; LAD = 大血管病变; MULT = 多种病因; OR = 比值比; SVD = 小血管病变。

<sup>a</sup> 对照组: 无偏头痛。

**表 4 偏头痛分别与隐源性及病因明确病例之间关系的多变量分析比较**

| 危险因素        | 比值比  | 95% CI    | p 值     |
|-------------|------|-----------|---------|
| 偏头痛         | 1.68 | 1.33-2.13 | <0.0001 |
| 年龄 (每 10 岁) | 0.84 | 0.78-0.92 | <0.0001 |
| 男性          | 0.79 | 0.64-0.98 | 0.03    |
| 高血压         | 0.60 | 0.48-0.75 | <0.0001 |
| 糖尿病         | 1.03 | 0.76-1.40 | 0.85    |
| 心绞痛         | 0.65 | 0.47-0.90 | 0.01    |
| 心肌梗死        | 0.81 | 0.56-1.17 | 0.26    |
| 周围血管疾病      | 0.48 | 0.31-0.76 | 0.002   |
| 吸烟史         | 1.03 | 0.84-1.27 | 0.76    |
| 高胆固醇血症      | 1.05 | 0.84-1.32 | 0.66    |
| 静脉血栓史       | 1.27 | 0.84-1.91 | 0.26    |
| 癌症          | 0.72 | 0.55-0.96 | 0.02    |
| 自身免疫性疾病     | 0.85 | 0.64-1.13 | 0.27    |

缩略语: CI = 可信区间。

及没有血管性危险因素的患者,这种相关性最强。这些发现提示在老年人中,偏头痛与隐源性 TIA 或缺血性卒中之间存在因果关系或共有 一个病因。

先前的研究已表明偏头痛与血管疾病有关,包括急性脑血管事件<sup>[11,20-22]</sup>、无症状脑损伤<sup>[23-25]</sup>、心脏疾病<sup>[26,27]</sup>、视网膜血管病变<sup>[28]</sup>以及血管性死亡<sup>[29]</sup>。发生缺血性卒中的风险可能随偏头痛发作频率的增加而增加,对于存在先兆偏头痛的患者和年轻女性而言这种风险更高<sup>[11]</sup>。但是,尽管有大量关于偏头痛与缺血性卒中风险的个体队列研究、病例对照研究以及 meta 分析<sup>[11,20,21]</sup>,却仅有 2 项针对缺血性卒中病因学亚型的偏头痛相关风险的小型病例对照研究,且两者结果相互矛盾。其中一项研究发现隐源性卒中患者 (n = 192) 存在视觉先兆偏头痛的可能性大约是对照组的两倍<sup>[12]</sup>,

另一项研究则报导隐源性病例组与对照组的偏头痛患病率相近<sup>[13]</sup>。两项研究均未比较不同卒中病因学亚型之间偏头痛患病率的差异,而且两项研究都是在年轻人群 (< 50 岁) 中进行的。另外,因为选择具有代表性的对照存在一定难度,所以病例对照研究会受到影响。这项以人群为基础的研究不存在选择偏倚,我们的发现则建立在其中的病例比较研究的基础之上,这为支持偏头痛与隐源性 TIA 或缺血性卒中之间存在显著关联增添了新的证据。我们认为隐源性事件患者比病因明确的患者更有可能存在既往偏头痛病史。此外,我们还发现,与病因明确的病例相比,偏头痛与隐源性病例之间的联系与其他血管性危险因素无关。这一发现得到了一项前瞻性队列研究的支持,该研究发现女性偏头痛患者中有超过一半的缺血性卒中 (64 例中有 35 例) 属于隐源性,但没有一例是由明显的动脉血栓或动脉栓塞引起<sup>[32]</sup>。

我们发现偏头痛独立于年龄、性别、高血压、糖尿病、高胆固醇血症以及吸烟,与隐源性病例相关联。对于没有其他血管性危险因素的患者而言,其相关性最强,这提示隐源性病例中偏头痛的可能的发病机制与血管负担无关,这与之前报道的无明显血管性疾病的患者的偏头痛相关性卒中风险最高的证据相一致<sup>[12,33]</sup>。存在几个潜在的机制可以解释这些发现。首先,偏头痛与卒中的一些其他罕见病因有关,如 PFO<sup>[34]</sup>和颈动脉夹层<sup>[35,36]</sup>。但是,OXVASC 纳入的所有隐源性病例都至少进行过颈动脉影像学检查以排除颈动脉夹层,虽然 PFO 的筛查不是常规检查项目,但是对于可能存在栓子来源的隐源性病例而言,无论伴或不伴偏头痛病史,其心源性脑栓塞或急性周围动脉疾病复发的风险

**图 按照血管性危险因素数量分层, 隐源性事件与病因明确事件患者中有偏头痛病史的比值比**

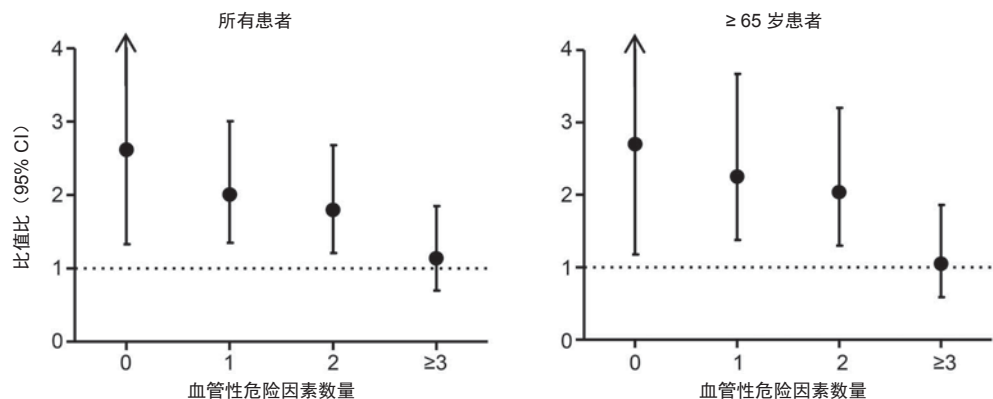

CI = 可信区间。

是没有差别的（数据未公布）。但是，有证据表明对于老年人而言，PFO与隐源性卒中有关<sup>[4]</sup>。考虑到我们发现在老年人中偏头痛与隐源性事件的相关性更强，因此，PFO可能可以解释老年人偏头痛与卒中之间的某些联系。其次，我们的研究表明对于正在接受HRT的患者而言，偏头痛与隐源性TIA或缺血性卒中的相关性通常更强。众所周知，HRT可以增加缺血性卒中的风险<sup>[37]</sup>，但它与偏头痛之间的相互联系尚未明晰。尽管口服避孕药可增加偏头痛年轻女性缺血性卒中的风险<sup>[20]</sup>，但当前的HRT指南并未对年长女性使用HRT提出任何异议<sup>[38]</sup>。我们的发现尽管没有统计学意义，但有利于未来的进一步研究，可是考虑到只有一小部分女性正在接受HRT，因此这无法完全解释偏头痛与隐源性事件之间的联系。第三，用于治疗偏头痛的药物，如 $\beta$ 受体阻滞剂、曲坦类药物以及麦角胺，可能能够导致一些隐源性事件的发生。但是，没有患者因紧急使用曲坦类药物或麦角胺而诱发卒中，虽然我们有1/4的患者正在服用 $\beta$ 受体阻滞剂，但在排除正在使用 $\beta$ 受体阻滞剂的患者后，灵敏度分析得到的结果具有一致性，即隐源性病例既往偏头痛的患病率更高。所以，偏头痛的治疗药物可能无法解释隐源性卒中与偏头痛之间的关系。

尽管发生缺血性卒中的相对风险提高了一倍，但按照绝对值计算，对于偏头痛患者而言，缺血性卒中仍属罕见并发症<sup>[10]</sup>。另外，大多数缺血性事件通常发生在偏头痛患者首次偏头痛发作的若干年后。因此，总的来说，偏头痛与隐源性事件或缺血性卒中之间可能不存在一个直接的因果关系。况且，考虑到遗传是偏头痛发病的一个重要因素<sup>[39]</sup>，所以基因或偏头痛与隐源性卒中中共有的某些未知的危险因素可能能够解释两者间的联系。

虽然我们认为我们的研究结果是有效的，但该研究仍存在一定的局限性。首先，TOAST分型被应用于TIA与卒中亚型的分型（表e-6）。尽管病因学分型原本并不适用于TIA患者，但先前的研究已证明TOAST标准适用于TIA<sup>[40]</sup>。另外，排除TIA的分析与主要分析相一致。其次，通过运用简单的结构式问卷对参与者进行问诊，从而获得偏头痛病史。因为OXVASC患者主要是老年人，所以无法完全排除回忆偏倚。但是，通过初级医疗记录可以反复核对所有的相关诊断。而且，

因为问诊过程由相同的人员利用相同的方案进行，所以不同病因学亚型的报告的准确性不应有任何差异。另外，任何对暴露状态的错误分类都可能会掩盖两者间的真实关系。然而，我们仍然发现了偏头痛病史与隐源性TIA或缺血性卒中之间的联系。第三，由于我们没有为患者筛查PFO，所以我们无法确认其与偏头痛以及卒中之间可能存在的联系。第四，鉴于我们采用的是横断面研究设计，如果偏头痛对一些已明确亚型的卒中的超急性期预后有影响，那么幸存者偏倚将也是一个潜在的限制因素。第五，因为我们没有纳入无卒中或TIA病史者作为对照组，我们无法确定病因明确的卒中亚型是否与偏头痛有关，即使其相关性弱于隐源性卒中。最后，与先前的研究类似，只有自述有偏头痛病史者才会被纳入OXVASC。因此，我们无法区分活动期偏头痛与既往偏头痛或不同发作频率的偏头痛。但是，有证据表明任何偏头痛都会使缺血性卒中的风险增加<sup>[20]</sup>。

我们的发现有如下意义。首先，因为偏头痛与缺血性卒中的关系在不同的卒中亚型中存在差异，所以未来队列研究中根据卒中亚型分层分析所得结果将有利于阐明偏头痛与卒中的潜在机制。其次，关于偏头痛与缺血性卒中关系的机制的研究应着重于隐源性脑血管事件患者。最后，鉴于在老年人中偏头痛与隐源性卒中的相关性最强，潜在的偏头痛相关性病因学的筛查，包括高凝状态、PFO或基因突变，不应仅局限于年轻的卒中患者。

## 作者贡献

L.L.: 研究设计、数据获取、原稿起草与修改、统计学分析、数据解读。U.G.S.: 数据获取与原稿修改。W.K.: 数据获取与原稿修改。P.M.R.: 研究概念与设计、原稿起草与修改、数据分析与解读、研究监督与提供资金。

## 鸣谢

作者感谢牛津急性血管成像中心及心血管临床研究机构的平台。感谢为牛津血管研究作出贡献的所有人员。

## 研究基金

OXVASC由Wellcome Trust、Wolfson基金、英国卒中协会、英国心脏基金、国家卫生研究院

(National Institute of Health Research, NIHR)、医学研究委员会以及NIHR牛津生物医学研究中心提供资金。Rothwell教授得到NIHR高级研究员奖及Wellcome Trust高级研究员奖的资助。Li博士得到中国国家留学基金委员会资助(CSC)。

## 声明

The authors report no disclosures relevant to the manuscript. Go to [Neurology.org](http://Neurology.org) for full disclosures.

Received January 17, 2015. Accepted in final form April 24, 2015.

## 参考文献

1. Amarenco P. Cryptogenic stroke, aortic arch atheroma, patent foramen ovale, and the risk of stroke. *Cerebrovasc Dis* 2005;20(suppl 2):68–74.
2. Bang OY, Lee PH, Joo SY, Lee JS, Joo IS, Huh K. Frequency and mechanisms of stroke recurrence after cryptogenic stroke. *Ann Neurol* 2003;54:227–234.
3. Hart RG, Diener HC, Coutts SB, et al. Embolic strokes of undetermined source: the case for a new clinical construct. *Lancet Neurol* 2014;13:429–438.
4. Handke M, Harloff A, Olschewski M, et al. Patent foramen ovale and cryptogenic stroke in older patients. *N Engl J Med* 2007;357:2262–2268.
5. Sanna T, Diener HC, Passman RS, et al. Cryptogenic stroke and underlying atrial fibrillation. *N Engl J Med* 2014;370:2478–2486.
6. Meissner I, Khandheria BK, Heit JA, et al. Patent foramen ovale: innocent or guilty? Evidence from a prospective population-based study. *J Am Coll Cardiol* 2006;47:440–445.
7. Di Tullio MR, Sacco RL, Sciacca RR, Jin Z, Homma S. Patent foramen ovale and the risk of ischemic stroke in a multiethnic population. *J Am Coll Cardiol* 2007;49:797–802.
8. Sposato LA, Riccio PM, Hachinski V. Poststroke atrial fibrillation: cause or consequence? Critical review of current views. *Neurology* 2014;82:1180–1186.
9. Etgen T, Hochreiter M, Mundel M, Freudenberg T. Insertable cardiac event recorder in detection of atrial fibrillation after cryptogenic stroke: an audit report. *Stroke* 2013;44:2007–2009.
10. Kurth T, Chabriat H, Boussier MG. Migraine and stroke: a complex association with clinical implications. *Lancet Neurol* 2012;11:92–100.
11. Spector JT, Kahn SR, Jones MR, Jayakumar M, Dalal D, Nazarian S. Migraine headache and ischemic stroke risk: an updated meta-analysis. *Am J Med* 2010;123:612–624.
12. MacClellan LR, Giles W, Cole J, et al. Probable migraine with visual aura and risk of ischemic stroke: the Stroke Prevention in Young Women study. *Stroke* 2007;38:2438–2445.
13. Schwaag S, Nabavi DG, Frese A, Husstedt IW, Evers S. The association between migraine and juvenile stroke: a case-control study. *Headache* 2003;43:90–95.
14. Rothwell PM, Coull AJ, Giles MF, et al. Change in stroke incidence, mortality, case-fatality, severity, and risk factors in Oxfordshire, UK from 1981 to 2004 (Oxford Vascular Study). *Lancet* 2004;363:1925–1933.
15. Feigin V, Hoorn SV. How to study stroke incidence. *Lancet* 2004;363:1920.
16. Adams HP Jr, Bendixen BH, Kappelle LJ, et al. Classification of subtype of acute ischemic stroke: definitions for use in a multicenter clinical trial: TOAST: Trial of Org 10172 in Acute Stroke Treatment. *Stroke* 1993;24:35–41.
17. Jackson C, Sudlow C. Are lacunar strokes really different? A systematic review of differences in risk factor profiles between lacunar and nonlacunar infarcts. *Stroke* 2005;36:891–901.
18. Simoni M, Li L, Paul NL, et al. Age- and sex-specific rates of leukoaraiosis in TIA and stroke patients: population-based study. *Neurology* 2012;79:1215–1222.
19. Wahlund LO, Barkhof F, Fazekas F, et al. A new rating scale for age-related white matter changes applicable to MRI and CT. *Stroke* 2001;32:1318–1322.
20. Schurks M, Rist PM, Bigal ME, Buring JE, Lipton RB, Kurth T. Migraine and cardiovascular disease: systematic review and meta-analysis. *BMJ* 2009;339:b3914.
21. Etminan M, Takkouche B, Isorna FC, Samii A. Risk of ischaemic stroke in people with migraine: systematic review and meta-analysis of observational studies. *BMJ* 2005;330:63.
22. Kurth T, Kase CS, Schurks M, Tzourio C, Buring JE. Migraine and risk of haemorrhagic stroke in women: prospective cohort study. *BMJ* 2010;341:c3659.
23. Swartz RH, Kern RZ. Migraine is associated with magnetic resonance imaging white matter abnormalities: a meta-analysis. *Arch Neurol* 2004;61:1366–1368.
24. Kruit MC, van Buchem MA, Hofman PA, et al. Migraine as a risk factor for subclinical brain lesions. *JAMA* 2004;291:427–434.
25. Kurth T, Mohamed S, Maillard P, et al. Headache, migraine, and structural brain lesions and function: population based Epidemiology of Vascular Ageing-MRI Study. *BMJ* 2011;342:c7357.
26. Kurth T, Gaziano JM, Cook NR, et al. Migraine and risk of cardiovascular disease in men. *Arch Intern Med* 2007;167:795–801.
27. Kurth T, Gaziano JM, Cook NR, Logroscino G, Diener HC, Buring JE. Migraine and risk of cardiovascular disease in women. *JAMA* 2006;296:283–291.
28. Rose KM, Wong TY, Carson AP, Couper DJ, Klein R, Sharrett AR. Migraine and retinal microvascular abnormalities: the Atherosclerosis Risk in Communities Study. *Neurology* 2007;68:1694–1700.
29. Schurks M, Rist PM, Shapiro RE, Kurth T. Migraine and mortality: a systematic review and meta-analysis. *Cephalalgia* 2011;31:1301–1314.
30. Kurth T, Schurks M, Logroscino G, Buring JE. Migraine frequency and risk of cardiovascular disease in women. *Neurology* 2009;73:581–588.
31. Donaghy M, Chang CL, Poulter N; European Collaborators of The World Health Organisation Collaborative Study of Cardiovascular D, Steroid Hormone C. Duration, frequency, recency, and type of migraine and the risk of ischaemic stroke in women of childbearing age. *J Neurol Neurosurg Psychiatry* 2002;73:747–750.
32. Rist PM, Buring JE, Kase CS, Schurks M, Kurth T. Migraine and functional outcome from ischemic cerebral events in women. *Circulation* 2010;122:2551–2557.
33. Kurth T, Schurks M, Logroscino G, Gaziano JM, Buring JE. Migraine, vascular risk, and cardiovascular events in women: prospective cohort study. *BMJ* 2008;337:a636.
34. Schwedt TJ, Demaerschalk BM, Dodick DW. Patent foramen ovale and migraine: a quantitative systematic review. *Cephalalgia* 2008;28:531–540.

35. Rist PM, Diener HC, Kurth T, Schurks M. Migraine, migraine aura, and cervical artery dissection: a systematic review and meta-analysis. *Cephalalgia* 2011;31:886–896.
36. Metso TM, Tatlisumak T, Debette S, et al. Migraine in cervical artery dissection and ischemic stroke patients. *Neurology* 2012;78:1221–1228.
37. Wassertheil-Smoller S, Hendrix SL, Limacher M, et al. Effect of estrogen plus progestin on stroke in postmenopausal women: the Women's Health Initiative: a randomized trial. *JAMA* 2003;289:2673–2684.
38. de Villiers TJ, Gass ML, Haines CJ, et al. Global consensus statement on menopausal hormone therapy. *Maturitas* 2013;74:391–392.
39. Eising E, de Vries B, Ferrari MD, Terwindt GM, van den Maagdenberg AM. Pearls and pitfalls in genetic studies of migraine. *Cephalalgia* 2013;33:614–625.
40. Amort M, Fluri F, Weisskopf F, et al. Etiological classifications of transient ischemic attacks: subtype classification by TOAST, CCS and ASCO: a pilot study. *Cerebrovasc Dis* 2012;33:508–516.

(黄丽丽 刘品一译 徐运 审校)
